# Supplementary material for: Confined phase separation of aqueous–organic nanodroplets
Source: Royal Society of Chemistry journal article supplement (doi:10.1039/c7cp04531j), 2017-01-01
Supplement: c7cp04531j1.pdf [file c7cp04531j1.pdf]

## Supporting Information

Cite this: DOI: 10.1039/xxxxxxxxxx

# CONFINED PHASE SEPARATION OF AQUEOUS-ORGANIC NANODROPLETS

Fawaz Hrahsheh,<sup>a†</sup> Yakubu Sani Wudil,<sup>a</sup> and Gerald Wilemski<sup>b‡</sup>

In this DFT theory, the Helmholtz free energy contains contributions from a hard sphere reference fluid and from the attractive potential  $\phi_{ij}$  between molecules of species  $i$  and species  $j$ .<sup>1-3</sup> Following Sullivan<sup>1</sup> and then Li and Wilemski<sup>4</sup>, we use the Yukawa attractive pair potential,

$$\phi_{ij}(r) = -\alpha_{ij}\lambda^2 \exp(-\lambda r)/(4\pi r), \quad (1)$$

where  $\alpha_{ij}$  is the strength parameter for the interaction between species  $i$  and  $j$ , and  $\lambda$  is an inverse range parameter that is assumed to be the same for all pair interactions in our model. The equilibrium density profiles are found by solving iteratively two coupled differential Euler-Lagrange equations<sup>4</sup>,

$$\nabla^2 \mu_{hi} = \lambda^2 (\mu_{hi} - \mu_i - \sum_{i,j} \alpha_{ij} \rho_j), \quad (2)$$

where  $\mu_{hi}$  is the local chemical potential of species  $i$  for the hard sphere fluid,  $\mu_i$  is the constant chemical potential of species  $i$  in the system. The interaction strength parameter  $\alpha_{ij} = \sqrt{\alpha_{ii}\alpha_{jj}}$  where  $\alpha_{ii} = 11.102kT_{ci}\sigma_i$ . The values for the Yukawa potential parameters are  $\sigma_w = 0.3$  nm,  $\sigma_p = 0.4595$  nm,  $T_{cw} = 720$  K,  $T_{cp} = 814$  K, and  $\lambda = 9.889$  nm<sup>-1</sup>. To investigate non-spherical structures of nanodroplets, we computationally and iteratively solve Eqn.2 using finite-difference method with cylindrical coordinates.

For binary systems Eqn.2 can be rewritten as following:

$$\nabla^2 \mu_{h1}(r, z) = \lambda^2 [\mu_{h1}(r, z) - \mu_1 - \alpha_{11}\rho_1(r, z) - \alpha_{12}\rho_2(r, z)] \quad (3)$$

$$\nabla^2 \mu_{h2}(r, z) = \lambda^2 [\mu_{h2}(r, z) - \mu_2 - \alpha_{21}\rho_1(r, z) - \alpha_{22}\rho_2(r, z)] \quad (4)$$

where  $\alpha_{12} = \alpha_{21}$ , and  $\rho_1(r, z)$  and  $\rho_2(r, z)$  are the density profiles of species 1 and species 2, respectively.

Assuming azimuthal symmetry, Eqns. 3 and 4 can be rewritten, for binary systems, using finite-difference method over a domain of  $(N+1, 2N+1)$  equally spaced mesh points so that  $r = nh$  and  $z = kh$  where  $n = 0, 1, 2, \dots, N+1$  and  $k = -N/2, \dots, N/2$ . Thus, the Euler-Lagrange differential equations (Eqns.3, 4) become:

$$\begin{aligned} \left(\frac{1}{2nh^2} + \frac{1}{h^2}\right) g_{n+1,k}^{t+1} - \left(\frac{4}{h^2} + \lambda^2\right) g_{n,k}^{t+1} - \left(\frac{1}{2nh^2} - \frac{1}{h^2}\right) g_{n-1,k}^{t+1} = \\ -\frac{g_{n,k+1}^t + g_{n,k-1}^t}{h^2} - \lambda^2 [\mu_1 - \alpha_{11}\rho_1^t(n, k) + \alpha_{12}\rho_2^t(n, k)] \end{aligned} \quad (5)$$

<sup>a</sup> Department of Physics, King Fahd University of Petroleum and Minerals, Dhahran 31261, KSA.

<sup>b</sup> Department of Physics, Missouri University of Science and Technology, Rolla, MO 65409, USA.

† Email:: fyh44f@mst.edu

‡ Email:: wilemski@mst.edu.

$$\left(\frac{1}{2nh^2} + \frac{1}{h^2}\right)q_{n+1,k}^{t+1} - \left(\frac{4}{h^2} + \lambda^2\right)q_{n,k}^{t+1} - \left(\frac{1}{2nh^2} - \frac{1}{h^2}\right)q_{n-1,k}^{t+1} = -\frac{q_{n,k+1}^t + q_{n,k-1}^t}{h^2} - \lambda^2[\mu_2 - \alpha_{21}\rho_1^t(n,k) + \alpha_{22}\rho_2^t(n,k)] \quad (6)$$

where  $g$  and  $q$  are  $\mu_{h1}$  and  $\mu_{h2}$ , respectively. The superscript  $t$  denotes the iteration number. Note that when  $r = 0$ ,  $\mu_{hi}(n-1, k) = \mu_{hi}(n+1, k)$  by symmetry. On another hand,  $\mu_{hi}(n+1, k) = \mu_{hi}(\rho_B)$  at  $r = Nh$  where  $\rho_B$  represents the densities of the bulk vapor phase. Similarly,  $\mu_{hi}(n, k-1) = \mu_{hi}(\rho_B)$  and  $\mu_{hi}(n, k+1) = \mu_{hi}(\rho_B)$  at  $z = -Nh/2$  and  $z = Nh/2$ , respectively.

The iterative solution process begins by using the initial trial profile for all  $\rho_i$  and  $\rho_j$  values in Eqns.(5) and (6). The equations are solved using a standard tridiagonal matrix routine where this solution then serves as the next trial profile. The initial density profiles are based on CS or WM structures that are somewhat larger than the final RDS structure. These profiles quickly creep to those of the RDS structure during the iterations and then remain stationary. If the initial structures are too small, no stationary solution is found. The initial density profiles shrink away completely. The iteration procedure is terminated when the difference between successive iterates becomes less than a prescribed limit  $\Delta$ . For our DFT calculations, typical parameter values are  $N = 4001$ ,  $r = 7.5$  nm,  $z = 15$  nm.

## References

- 1 D. E. Sullivan, *J. Chem. Phys.*, 1982, **77**, 2632–2638.
- 2 X. C. Zeng and D. W. Oxtoby, *J. Chem. Phys.*, 1991, **95**, 5940–5947.
- 3 D. W. Oxtoby and R. Evans, *J. Chem. Phys.*, 1988, **89**, 7521–7530.
- 4 J.-S. Li and G. Wilemski, *Phys. Chem. Chem. Phys.*, 2006, **8**, 1266–70.
